# Supplementary material for: Effect of Post-Weaning Concentrate Feeding Prior to Forage Finishing on Intramuscular Fat Deposition
Source: MDPI journal article supplement (doi:10.3390/ani14030496), 2024-02-02
Supplement: s1 [file s1]

**Supplemental Table S1.** Primer sequences (5' to 3') for quantitative real-time PCR of lipogenic genes.

| Gene <sup>1</sup> | Forward                | Reverse                | Efficiency |
|-------------------|------------------------|------------------------|------------|
| ACC               | AGCTGAATTTTCGCAGCAAT   | GGTTTTCTCCCCAGGAAAAG   | 1.07       |
| ACTB              | CTCTTTCAGCCTTCCTTCCT   | GGGCAGTGATCTCTTTCTGC   | 1.01       |
| AMPK              | TTGGCACCGATGTAACCTGA   | CTGGACAGAAGGAAGCAAGG   | 1.03       |
| CD36              | GCATTCTGAAAGTGCGTTGA   | CGGGTCTGATGAAAGTGGTT   | 1.02       |
| CPT1b             | GCACCTCTTCTGCCTTTACG   | CGATCTGGCTAGTGGAGAGG   | 1.00       |
| CPT2              | CCTTCCTTCCTGTCTTGGTATG | GGTCTGGGTAAACGAGTTGAA  | 1.05       |
| EIF3K             | CTGACAGACAGCCAGCTAAA   | CACGATGTTCTTGGGCTTTATG | 1.02       |
| ELOVL5            | GTCATCTGGCCGTGTACCTT   | GGGAAGAAAAGCTGCTGATG   | 1.02       |
| ELOVL6            | GGAAAGCAACGAAAGCTGAC   | TGGGTTGTGTGTTTGCTCAT   | 1.05       |
| FABP4             | CATCTTGCTGAAAGCTGCAC   | AGCCACTTTCCTGGTAGCAA   | 1.00       |
| FASN              | GCATCGCTGGCTACTCCTAC   | GTGTAGGCCATCACGAAGGT   | 0.95       |
| FFAR1             | TTAGCCTCTCGCTTCTGCTC   | GCCTTTAGCTTCCGTCTGTG   | 1.03       |
| FFAR2             | TGGGTCATGTCTTTTGGTCA   | GCTCTTGGGTGAAGTTCTCG   | 1.04       |
| FFAR3             | ACTCCTTCTTCCTCGGCAAT   | AGATCCGAGAGGGTGAGGTT   | 1.05       |
| FFAR4             | AGGAACGAATGGAGGAGGTT   | GTGCTGAGGGTCATGGAAAT   | 1.04       |
| GAPDH             | GGGTCATCATCTCTGCACCT   | GGTCATAAGTCCCCTCCACGA  | 0.97       |
| GLUT4             | ACCTTATGGCCACTCCTCCT   | CTCAGCCAACACCTCAGACA   | 0.99       |
| PLIN5             | AAGTCAGAGGAGCTGGTGGA   | CCCAGAGAGTGCTCATAGGC   | 1.00       |
| PPARG             | AGGATGGGGTCCTCATATCC   | GCGTTGAACTTCACAGCAAA   | 1.00       |
| PPARGC1A          | CTTCCTCCTGACACCCATGT   | CGCTCCTCAGAAAGAACCAC   | 0.98       |
| PREF1             | TCTGCGCTACAACCACATGT   | TGGTGAAGGTGGTVATGTCG   | 0.98       |
| SCAP              | GGCTGATCCATGGTCACTTT   | AGTGGGTAGCAGCAGGCTAA   | 1.05       |
| SCD1              | TTATTCCGTTATGCCCTTGG   | GGTAGTTGTGGAAGCCCTCA   | 0.95       |

|         |                        |                         |      |
|---------|------------------------|-------------------------|------|
| SREBP1c | CTGGAGAAGCTGGACTGAGG   | GCTTTCCCAAGACTCAGCAC    | 0.95 |
| Thy1    | CACCTCTGCCAATACCACCT   | ATACCCCTCCATCCTTCCAC    | 1.04 |
| UXT     | GGTGGATTTGGGCTGTAACT   | TGTGGATATGGGCCTTGATATTC | 1.00 |
| ZFP423  | GAAGACCATCCACGCAGATAAG | GATGCTGCCAAACTGCATTAC   | 1.00 |

<sup>1</sup>Acetyl CoA carboxylase (ACC); beta-actin (ACTB); AMP-activated protein kinase (AMPK); cluster differentiation factor 36 or fatty acid translocase (CD36); carnitine palmitoyltransferase 1b (CPT1b); carnitine palmitoyltransferase 2 (CPT2); eukaryotic translation initiation factor 3 (EIF3K); Fatty acid elongase 5 (ELOVL5); fatty acid elongase 6 (ELOVL6); fatty acid binding protein 4 (FABP4); fatty acid synthase (FASN); free fatty acid receptor 1-4 (FFAR1-4); glyceraldehyde 3-phosphate dehydrogenase (GAPDH); glucose transporter 4 (GLUT4); Perilipin 5 (PLIN5); peroxisome proliferator-activated receptor  $\gamma$  (PPAR $\gamma$ ); PPAR $\gamma$  coactivator-1  $\alpha$  (PPARGC1A); SREBP cleavage activating protein (SCAP); stearoyl CoA desaturase-1 (SCD); sterol regulatory element-binding protein 1c (SREBP1c); Thy1 cell surface antigen (Thy1); Ubiquitously expressed prefoldin like chaperone (UXT); zinc finger protein 423 (ZFP423).
